# Supplementary material
Source: Springer Nature journal article supplement (https://www.springermedizin.de/resource/supplementary/12911_2009_304_MOESM12_ESM.pdf/9525492)

# Loading time Rule Flow in relation to the number of decision nodes

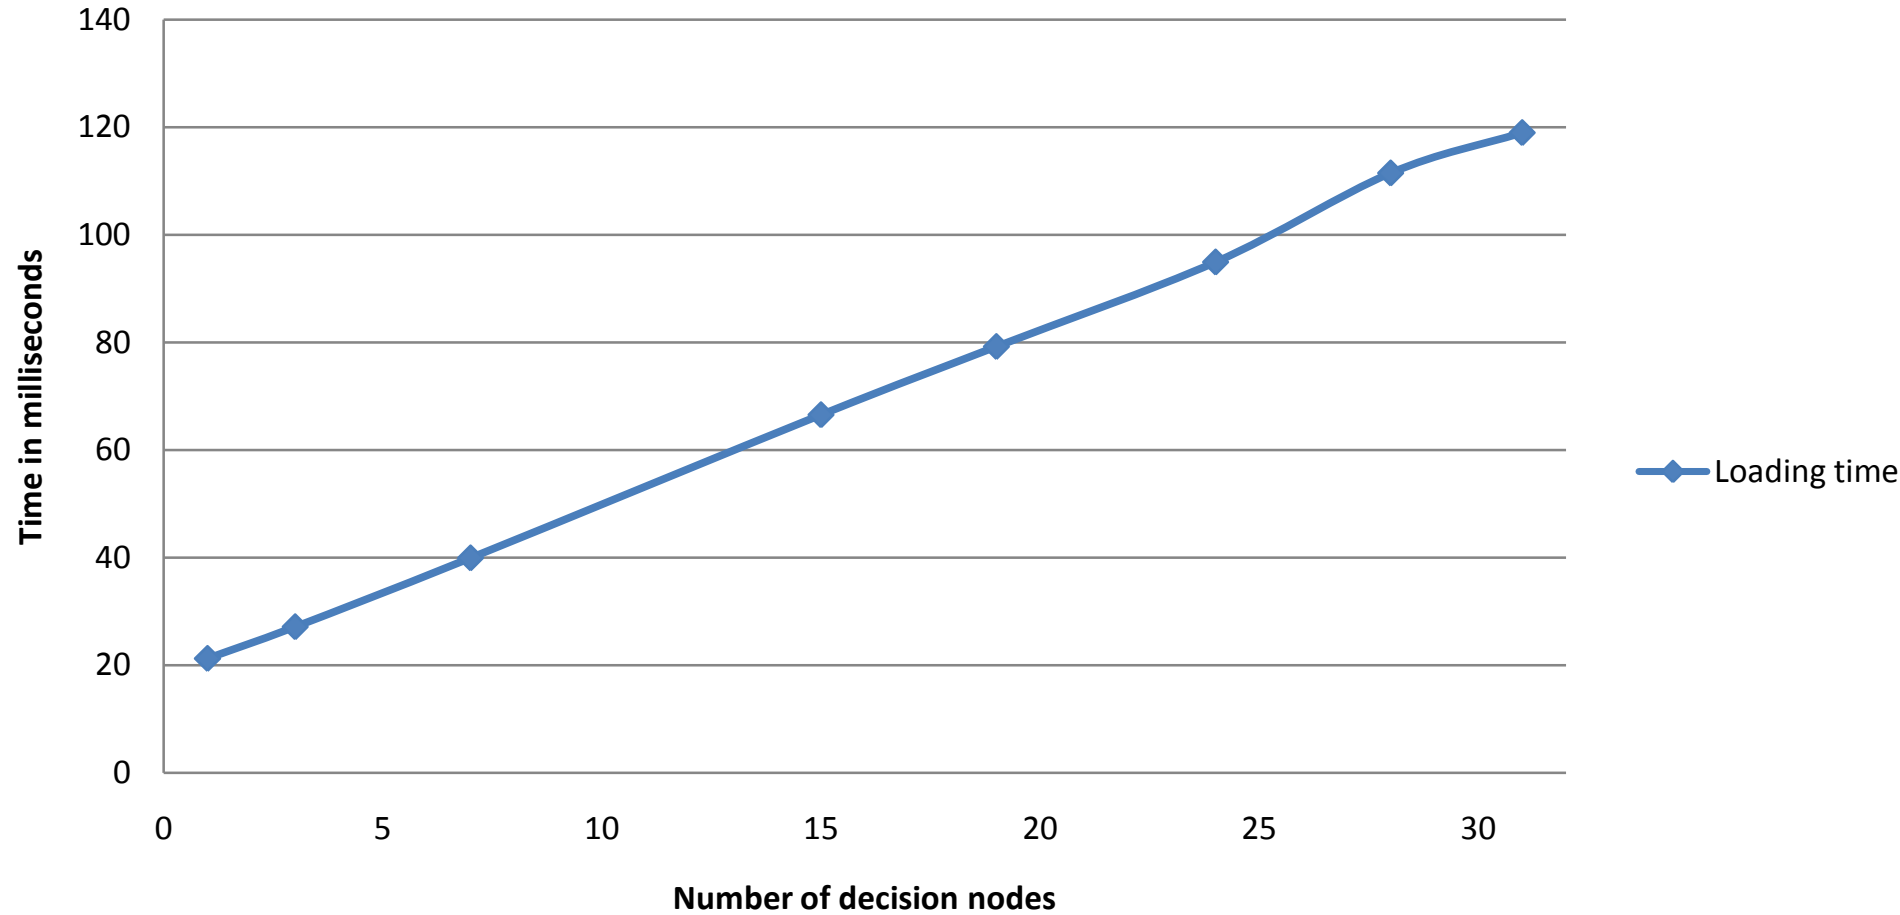

Supplement: MOESM12 [file 9525492]
